# Supplementary material
Source: Springer Nature journal article supplement (https://www.springermedizin.de/resource/supplementary/12911_2012_770_MOESM3_ESM.pdf/9526286)
Supplement: MOESM3 [file 9526286]

First Generation

Age  $\geq 12$

TRUE

Second Generation

Triage  $\geq 5$

Triage  $\geq 3$

TRUE

Third Generation

Age  $\geq 5$

Age  $\leq 1$

Triage  $\geq 2$

Age  $\leq 18$
